# Supplementary material
Source: PubMed Central journal article supplement (PMC9647034)
Supplement: mmc1.pdf [file mmc1.pdf]

# THE LANCET Rheumatology

## Supplementary appendix

This appendix formed part of the original submission and has been peer reviewed.  
We post it as supplied by the authors.

Supplement to: Patel B, Kleeman SO, Neavin D, et al. Shared genetic susceptibility  
between trigger finger and carpal tunnel syndrome: a genome-wide association study.  
*Lancet Rheumatol* 2022; **4**: e556–65.

## Appendix: Shared genetic susceptibility between trigger finger and carpal tunnel syndrome: a genome-wide association study

Benjamin Patel BMBCh, Sam O. Kleeman BMBCh, Drew Neavin PhD, Professor Joseph Powell PhD, Georgios Baskozos PhD, Michael Ng PhD, Waheed-Ul-Rahman Ahmed MBBS, Professor David L. Bennett PhD, Professor Annina B. Schmid PhD, Professor Dominic Furniss DM, Akira Wiberg DPhil

| Page number | Nature of contents                                                                                                                   |
|-------------|--------------------------------------------------------------------------------------------------------------------------------------|
| 2           | Table 1: GWAS cohort definitions                                                                                                     |
| 3-4         | Table 2: Cohort characteristics for trigger finger (TF) and carpal tunnel syndrome (CTS) cases in UK Biobank                         |
| 5           | Table 3: Results of association analysis for TF                                                                                      |
| 6           | Table 4: Sensitivity analysis showing results for each locus from primary TF GWAS using alternative case definitions                 |
| 7           | Table 5: Meta-analysis of UKB and FinnGen summary statistics for TF                                                                  |
| 8-9         | Table 6: Finemapping of 95% credible set colocalised variants in TF-CTS genome-wide analysis                                         |
| 10          | Table 7: Summary statistics for cis-eQTL analysis for rs62175241 on IGFBP5 in single-cell sequenced fibroblast clusters              |
| 11          | Table 8: Phenome-wide association for rs62175241                                                                                     |
| 12          | Figure S1: CONSORT diagram summarising the selection of case and control cohorts for trigger finger genome-wide association analysis |
| 13          | Figure S2: Genomic context of rs62175241                                                                                             |

**Table 1:** GWAS case definitions in UK Biobank, including the core analysis and sensitivity analyses

|                  | <b>Case (n)</b> | <b>Control (n)</b> | <b>Case definition</b>                              |
|------------------|-----------------|--------------------|-----------------------------------------------------|
| Core analysis    | 2,908           | 436,579            | TF ICD <u>and</u> TF OPCS-4                         |
| Extended cohort  | 3,963           | 436,579            | TF ICD <u>or</u> TF OPCS-4                          |
| Mixed cohort     | 4,512           | 436,579            | TF ICD <u>or</u> TF OPCS-4 <u>or</u> TF self-report |
| TF excluding CTS | 2,110           | 436,579            | (TF ICD <u>and</u> TF OPCS-4), <u>without</u> CTS   |
| Merged TF-CTS    | 16,904          | 436,579            | (TF ICD <u>and</u> TF OPCS-4), <u>or</u> , CTS      |

**Table 2:** Cohort characteristics, for TF and CTS cases in UKB. p-value refers to Kruskal-Wallis non-parametric test (continuous variable) or chi-squared test for independence (binary variable) across all three groups.

|                         | <b>Overlap TF-<br/>CTS (N = 887)</b> | <b>Carpal tunnel<br/>syndrome (N = 15,407)</b> | <b>Trigger finger (N = 2,326)</b> | <b>p-value (All)</b>   |
|-------------------------|--------------------------------------|------------------------------------------------|-----------------------------------|------------------------|
| <b>Age of diagnosis</b> |                                      |                                                |                                   |                        |
| min                     | 32.72                                | 28.74                                          | 31.66                             |                        |
| max                     | 77.92                                | 78.06                                          | 77.43                             |                        |
| mean (sd)               | 57.81 ± 8.11                         | 57.15 ± 8.92                                   | 60.09 ± 7.62                      | 9.49×10 <sup>-10</sup> |
| <b>Sex</b>              |                                      |                                                |                                   |                        |
| Male (%)                | 272 (31)                             | 4,634 (30)                                     | 1,003 (43)                        |                        |
| Female (%)              | 615 (69)                             | 10,773 (70)                                    | 1,323 (57)                        | 2.67×10 <sup>-35</sup> |
| <b>BMI</b>              |                                      |                                                |                                   |                        |
| min                     | 17.78                                | 13.12                                          | 15.64                             |                        |
| max                     | 61                                   | 74.68                                          | 51.9                              |                        |
| mean (sd)               | 29.68 ± 5.59                         | 29.48 ± 5.75                                   | 28.32 ± 4.83                      | 1.71×10 <sup>-17</sup> |
| <b>Height</b>           |                                      |                                                |                                   |                        |
| min                     | 145                                  | 100                                            | 141                               |                        |
| max                     | 204                                  | 200                                            | 197                               |                        |
| mean (sd)               | 164.12 ± 9.06                        | 164.43 ± 8.72                                  | 166.76 ± 9.14                     | 9.24×10 <sup>-32</sup> |
| <b>HbA1c (IFCC)</b>     |                                      |                                                |                                   |                        |

|                          |               |              |              |                        |
|--------------------------|---------------|--------------|--------------|------------------------|
| min                      | 24.5          | 15.3         | 22.8         |                        |
| max                      | 125.4         | 132          | 103          |                        |
| mean (sd)                | 40.04 ± 11.07 | 37.92 ± 8.44 | 38.75 ± 9.91 | 4.79×10 <sup>-6</sup>  |
| <b>Comorbidities (%)</b> |               |              |              |                        |
| Current smoker           | 94 (11)       | 1,728 (11)   | 230 (10)     | 0.14                   |
| Previous smoker          | 333 (38)      | 5,835 (38)   | 959 (41)     | 7.00×10 <sup>-3</sup>  |
| T1DM                     | 80 (9)        | 524 (3)      | 123 (5)      | 5.42×10 <sup>-19</sup> |
| T2DM                     | 191 (22)      | 2,476 (16)   | 405 (17)     | 5.07×10 <sup>-5</sup>  |
| Hypertension             | 441 (50)      | 7,196 (47)   | 1,069 (46)   | 0.15                   |
| High cholesterol         | 321 (36)      | 5,077 (33)   | 888 (38)     | 1.26×10 <sup>-6</sup>  |
| Gout                     | 43 (5)        | 744 (5)      | 118 (5)      | 0.87                   |
| Osteoarthritis           | 463 (52)      | 6,749 (44)   | 891 (38)     | 2.52×10 <sup>-12</sup> |
| Hypothyroidism           | 1 (0)         | 7 (0)        | 0 (0)        | 0.36                   |
| Rheumatoid arthritis     | 252 (28)      | 3,706 (24)   | 486 (21)     | 1.96×10 <sup>-5</sup>  |

**Table 3:** Results of association analysis for TF. Lead SNP refers to SNP with the lowest p-value at each independent locus.

| <b>Chromosome</b> | <b>Position (GRCh37)</b> | <b>Lead SNP</b> | <b>Effect allele</b> | <b>Non-effect allele</b> | <b>Effect allele frequency</b> | <b>Odds ratio (95% CI)</b> | <b>p-value</b>         |
|-------------------|--------------------------|-----------------|----------------------|--------------------------|--------------------------------|----------------------------|------------------------|
| 2                 | 218144954                | rs10203066      | A                    | G                        | 0.14                           | 0.75 (0.69–0.82)           | $6.73 \times 10^{-13}$ |
| 5                 | 64783767                 | rs2087927       | A                    | G                        | 0.26                           | 0.84 (0.79–0.89)           | $4.04 \times 10^{-9}$  |
| 11                | 65320780                 | rs4244811       | G                    | A                        | 0.33                           | 1.17 (1.11–1.23)           | $3.37 \times 10^{-9}$  |
| 16                | 53908657                 | rs10521304      | T                    | C                        | 0.54                           | 0.82 (0.78–0.86)           | $2.76 \times 10^{-14}$ |
| 16                | 69887707                 | rs3790086       | C                    | G                        | 0.54                           | 0.87 (0.83–0.92)           | $3.61 \times 10^{-8}$  |

**Table 4:** Sensitivity analysis showing results for each locus from primary TF GWAS, using alternative case definitions, as described in Table 1. The control cohort is unchanged in each analysis. FinnGen R4 refers to our TF replication cohort, derived from the FinnGen pipeline.

|            |                   |            |               |                   | Core analysis          |                  | Extended cohort        |                  | Mixed cohort           |                  |
|------------|-------------------|------------|---------------|-------------------|------------------------|------------------|------------------------|------------------|------------------------|------------------|
| Chromosome | Position (GRCh37) | Lead SNP   | Effect allele | Non-effect allele | p-value                | OR (95% CI)      | p-value                | OR (95% CI)      | p-value                | OR (95% CI)      |
| 2          | 218144954         | rs10203066 | A             | G                 | $6.7 \times 10^{-13}$  | 0.75 (0.69–0.81) | $1.60 \times 10^{-11}$ | 0.80 (0.74–0.85) | $1.51 \times 10^{-10}$ | 0.82 (0.77–0.87) |
| 5          | 64783767          | rs2087927  | A             | G                 | $4.04 \times 10^{-9}$  | 1.20 (0.78–0.88) | $2.2 \times 10^{-6}$   | 0.88 (0.84–0.93) | $9.75 \times 10^{-7}$  | 0.87 (0.84–0.93) |
| 11         | 65320780          | rs4244811  | G             | A                 | $3.37 \times 10^{-9}$  | 1.18 (1.12–1.24) | $4.64 \times 10^{-8}$  | 1.14 (1.09–1.19) | $1.84 \times 10^{-9}$  | 1.14 (1.10–1.19) |
| 16         | 53908657          | rs10521304 | T             | C                 | $2.76 \times 10^{-14}$ | 0.82 (0.78–0.86) | $1.33 \times 10^{-12}$ | 0.85 (0.81–0.89) | $9.83 \times 10^{-11}$ | 0.87 (0.84–0.91) |
| 16         | 69887707          | rs3790086  | C             | G                 | $3.61 \times 10^{-8}$  | 0.87 (0.82–0.91) | $2.57 \times 10^{-7}$  | 0.89 (0.85–0.93) | $7.65 \times 10^{-7}$  | 0.90 (0.86–0.94) |
|            |                   |            |               |                   |                        |                  |                        |                  |                        |                  |
|            |                   |            |               |                   | TF excluding CTS       |                  | Merged TF-CTS          |                  | FinnGen R4             |                  |
| Chromosome | Position (GRCh37) | Lead SNP   | Effect allele | Non-effect allele | p-value                | OR (95% CI)      | p-value                | OR (95% CI)      | p-value                | OR (95% CI)      |
| 2          | 218144954         | rs10203066 | A             | G                 | $1.53 \times 10^{-10}$ | 0.74 (0.67–0.81) | $1.28 \times 10^{-24}$ | 0.84 (0.82–0.87) | 0.0055                 | 0.88 (0.81–0.96) |
| 5          | 64783767          | rs2087927  | A             | G                 | $1.23 \times 10^{-4}$  | 0.87 (0.81–0.94) | $1.33 \times 10^{-5}$  | 0.95 (0.92–0.97) | 0.6166                 | 0.98 (0.90–1.07) |
| 11         | 65320780          | rs4244811  | G             | A                 | $1.05 \times 10^{-9}$  | 1.22 (1.14–1.29) | $8.49 \times 10^{-6}$  | 1.05 (1.03–1.08) | 0.0205                 | 0.90 (0.82–0.98) |
| 16         | 53908657          | rs10521304 | T             | C                 | $2.18 \times 10^{-13}$ | 0.80 (0.75–0.84) | $1.80 \times 10^{-1}$  | 0.98 (0.96–1.00) | 0.0562                 | 0.93 (0.86–1.00) |
| 16         | 69887707          | rs3790086  | C             | G                 | $1.94 \times 10^{-11}$ | 0.81 (0.77–0.86) | $1.84 \times 10^{-3}$  | 0.97 (0.94–0.99) | 0.0009                 | 0.88 (0.82–0.95) |

**Table 5:** Meta-analysis of UKB and FinnGen summary statistics for TF. Direction refers to either risk-increasing (+) or risk-reducing (-) effects of Allele 1. There was directional concordance between UKB and FinnGen at all five loci.

| SNP        | Allele 1 | Allele 2 | Zscore | p-value                | Direction | HetISq <sup>a</sup> | HetChiSq <sup>b</sup> | HetDf <sup>c</sup> | HetPVal <sup>d</sup> |
|------------|----------|----------|--------|------------------------|-----------|---------------------|-----------------------|--------------------|----------------------|
| rs10203066 | A        | G        | -7.62  | $2.4 \times 10^{-14}$  | --        | 17.3                | 1.21                  | 1                  | 0.271                |
| rs2087927  | A        | G        | -5.37  | $7.70 \times 10^{-8}$  | --        | 83.3                | 5.97                  | 1                  | 0.0145               |
| rs4244811  | G        | A        | 6.29   | $3.18 \times 10^{-10}$ | ++        | 0                   | 0.765                 | 1                  | 0.382                |
| rs10521304 | T        | C        | -7.57  | $3.75 \times 10^{-14}$ | --        | 76.5                | 4.25                  | 1                  | 0.0392               |
| rs3790086  | C        | G        | -6.43  | $1.24 \times 10^{-10}$ | --        | 0                   | 0.0430                | 1                  | 0.835                |

<sup>a</sup>HetISq is the heterogeneity of  $I^2$  parameter

<sup>b</sup>HetChiSq is the heterogeneity of  $\text{Chi}^2$  parameter

<sup>c</sup>HetDf is the heterogeneity of degrees of freedom

<sup>d</sup>HetPVal is the heterogeneity of P value



**Table 6:** Fine-mapping of 95% credible set colocalised variants in TF-CTS genome-wide analysis.

| Chr | Position  | A0 | A1 | SNP        | A1 frequency | INFO score | Beta  | SE    | p-value                | Consequence               | Gene              |
|-----|-----------|----|----|------------|--------------|------------|-------|-------|------------------------|---------------------------|-------------------|
| 2   | 218134988 | T  | C  | rs62175241 | 0.856        | 0.998      | 0.285 | 0.041 | $1.01 \times 10^{-12}$ | TF_binding_site_variant   | -                 |
| 2   | 218120660 | A  | G  | rs12622529 | 0.856        | 0.994      | 0.283 | 0.041 | $1.50 \times 10^{-12}$ | regulatory_region_variant | -                 |
| 2   | 218121776 | A  | G  | rs4674138  | 0.856        | 0.995      | 0.280 | 0.041 | $2.62 \times 10^{-12}$ | intergenic_variant        | -                 |
| 2   | 218121903 | A  | G  | rs56733382 | 0.856        | 0.995      | 0.281 | 0.041 | $2.65 \times 10^{-12}$ | intergenic_variant        | -                 |
| 2   | 218126236 | C  | T  | rs10490757 | 0.856        | 0.998      | 0.279 | 0.041 | $2.99 \times 10^{-12}$ | regulatory_region_variant | -                 |
| 2   | 218127033 | T  | C  | rs62175239 | 0.856        | 0.998      | 0.286 | 0.041 | $9.38 \times 10^{-13}$ | intergenic_variant        | -                 |
| 2   | 218129547 | G  | A  | rs4674139  | 0.856        | 0.998      | 0.284 | 0.041 | $1.29 \times 10^{-12}$ | intergenic_variant        | -                 |
| 2   | 218134786 | T  | G  | rs62175240 | 0.856        | 0.998      | 0.285 | 0.041 | $1.0 \times 10^{-12}$  | intergenic_variant        | -                 |
| 2   | 218138484 | C  | T  | rs11695415 | 0.856        | 0.998      | 0.280 | 0.041 | $2.19 \times 10^{-12}$ | intergenic_variant        | -                 |
| 2   | 218138857 | C  | G  | rs60279308 | 0.856        | 0.998      | 0.282 | 0.041 | $1.75 \times 10^{-12}$ | intergenic_variant        | -                 |
| 2   | 218139894 | G  | C  | rs10490758 | 0.855        | 0.997      | 0.282 | 0.041 | $1.61 \times 10^{-12}$ | intergenic_variant        | -                 |
| 2   | 218140435 | C  | T  | rs11676136 | 0.856        | 0.998      | 0.280 | 0.041 | $2.13 \times 10^{-12}$ | intergenic_variant        | -                 |
| 2   | 218142424 | C  | A  | rs16857158 | 0.856        | 0.998      | 0.280 | 0.041 | $2.25 \times 10^{-12}$ | regulatory_region_variant | -                 |
| 2   | 218143731 | T  | C  | rs2113825  | 0.856        | 0.998      | 0.280 | 0.041 | $2.15 \times 10^{-12}$ | upstream_gene_variant     | <i>AC009492.1</i> |
| 2   | 218144954 | A  | G  | rs10203066 | 0.856        | 1.000      | 0.288 | 0.041 | $6.73 \times 10^{-13}$ | regulatory_region_variant | -                 |

|   |           |   |   |            |       |       |       |       |                        |                               |              |
|---|-----------|---|---|------------|-------|-------|-------|-------|------------------------|-------------------------------|--------------|
| 2 | 218145707 | A | G | rs10221930 | 0.856 | 0.999 | 0.281 | 0.041 | $2.09 \times 10^{-12}$ | downstream_<br>gene_variant   | <i>DIRC3</i> |
| 2 | 218146108 | C | G | rs10221933 | 0.857 | 0.999 | 0.279 | 0.041 | $3.17 \times 10^{-12}$ | downstream_<br>gene_variant   | <i>DIRC3</i> |
| 2 | 218146354 | G | T | rs57632285 | 0.856 | 0.998 | 0.280 | 0.041 | $2.4 \times 10^{-12}$  | downstream_<br>gene_variant   | <i>DIRC3</i> |
| 2 | 218146382 | G | A | rs57794967 | 0.856 | 0.998 | 0.280 | 0.041 | $2.46 \times 10^{-12}$ | downstream_<br>gene_variant   | <i>DIRC3</i> |
| 2 | 218147429 | G | A | rs11683981 | 0.856 | 0.998 | 0.281 | 0.041 | $2.26 \times 10^{-12}$ | regulatory_<br>region_variant | -            |
| 2 | 218148030 | G | C | rs6713558  | 0.856 | 0.998 | 0.279 | 0.041 | $2.91 \times 10^{-12}$ | downstream_<br>gene_variant   | <i>DIRC3</i> |

**Table 7:** Summary statistics for cis-expression quantitative trait loci (eQTL) analysis for our fine-mapped SNP, rs62175241, on Insulin Like Growth Factor Binding Protein-5 (IGFBP5) in single-cell sequenced fibroblast clusters from 79 donors.

| <b>Cell cluster</b> | <b>SNP</b>    | <b>Beta</b> | <b>t-stat</b> | <b>p-value</b>        |
|---------------------|---------------|-------------|---------------|-----------------------|
| HOXC6+              | 2:218134988_T | 0.927       | 4.607         | $1.62 \times 10^{-5}$ |
| ATF1+               | 2:218134988_T | 0.835       | 4.055         | $1.20 \times 10^{-4}$ |
| TEAD2+              | 2:218134988_T | 0.654       | 3.018         | $3.46 \times 10^{-3}$ |
| SIX5+               | 2:218134988_T | 0.632       | 2.948         | $4.24 \times 10^{-3}$ |
| KLF10+              | 2:218134988_T | 0.517       | 2.257         | $2.69 \times 10^{-3}$ |
| RXRB+               | 2:218134988_T | 0.451       | 1.606         | 0.113                 |

**Table 8:** Phenome-wide association for the fine-mapped SNP, rs62175241, with data derived from OpenTargets Genetics Portal. Data ordered by increasing p-value.

| Study ID         | Trait                                       | p-value                | Beta    | N Overall |
|------------------|---------------------------------------------|------------------------|---------|-----------|
| GCST90000025     | Appendicular lean mass                      | $4.90 \times 10^{-33}$ | -0.032  | 450243    |
| NEALE2_50_raw    | Standing height                             | $3.57 \times 10^{-18}$ | -0.185  | 360388    |
| NEALE2_23129_raw | Trunk fat-free mass                         | $1.40 \times 10^{-16}$ | -0.090  | 354530    |
| NEALE2_23130_raw | Trunk predicted mass                        | $1.96 \times 10^{-16}$ | -0.086  | 354494    |
| NEALE2_23101_raw | Whole body fat-free mass                    | $3.04 \times 10^{-15}$ | -0.167  | 354808    |
| NEALE2_23102_raw | Whole body water mass                       | $3.39 \times 10^{-15}$ | -0.123  | 354834    |
| NEALE2_23122_raw | Arm predicted mass (right)                  | $6.55 \times 10^{-13}$ | -0.010  | 354726    |
| NEALE2_23105_raw | Basal metabolic rate                        | $6.68 \times 10^{-13}$ | -20.402 | 354825    |
| NEALE2_23113_raw | Leg fat-free mass (right)                   | $6.92 \times 10^{-13}$ | -0.029  | 354798    |
| NEALE2_23126_raw | Arm predicted mass (left)                   | $7.15 \times 10^{-13}$ | -0.010  | 354653    |
| NEALE2_23114_raw | Leg predicted mass (right)                  | $9.27 \times 10^{-13}$ | -0.027  | 354798    |
| NEALE2_23125_raw | Arm fat-free mass (left)                    | $1.05 \times 10^{-12}$ | -0.011  | 354668    |
| NEALE2_23121_raw | Arm fat-free mass (right)                   | $1.11 \times 10^{-12}$ | -0.010  | 354732    |
| NEALE2_20015_raw | Sitting height                              | $1.83 \times 10^{-11}$ | -0.082  | 360066    |
| NEALE2_23118_raw | Leg predicted mass (left)                   | $1.38 \times 10^{-10}$ | -0.024  | 354766    |
| NEALE2_23117_raw | Leg fat-free mass (left)                    | $1.85 \times 10^{-10}$ | -0.026  | 354771    |
| NEALE2_46_raw    | Hand grip strength (left)                   | $3.01 \times 10^{-9}$  | -0.151  | 359704    |
| NEALE2_1697      | Comparative height size at age 10           | $6.10 \times 10^{-9}$  | -0.013  | 355331    |
| NEALE2_47_raw    | Hand grip strength (right)                  | $2.27 \times 10^{-7}$  | -0.132  | 359729    |
| NEALE2_3062_raw  | Forced vital capacity (fvc)                 | $1.14 \times 10^{-6}$  | -0.013  | 329404    |
| NEALE2_3063_raw  | Forced expiratory volume in 1-second (fev1) | $3.67 \times 10^{-6}$  | -0.009  | 329404    |
| NEALE2_21002_raw | Weight                                      | $8.28 \times 10^{-6}$  | -0.212  | 360116    |

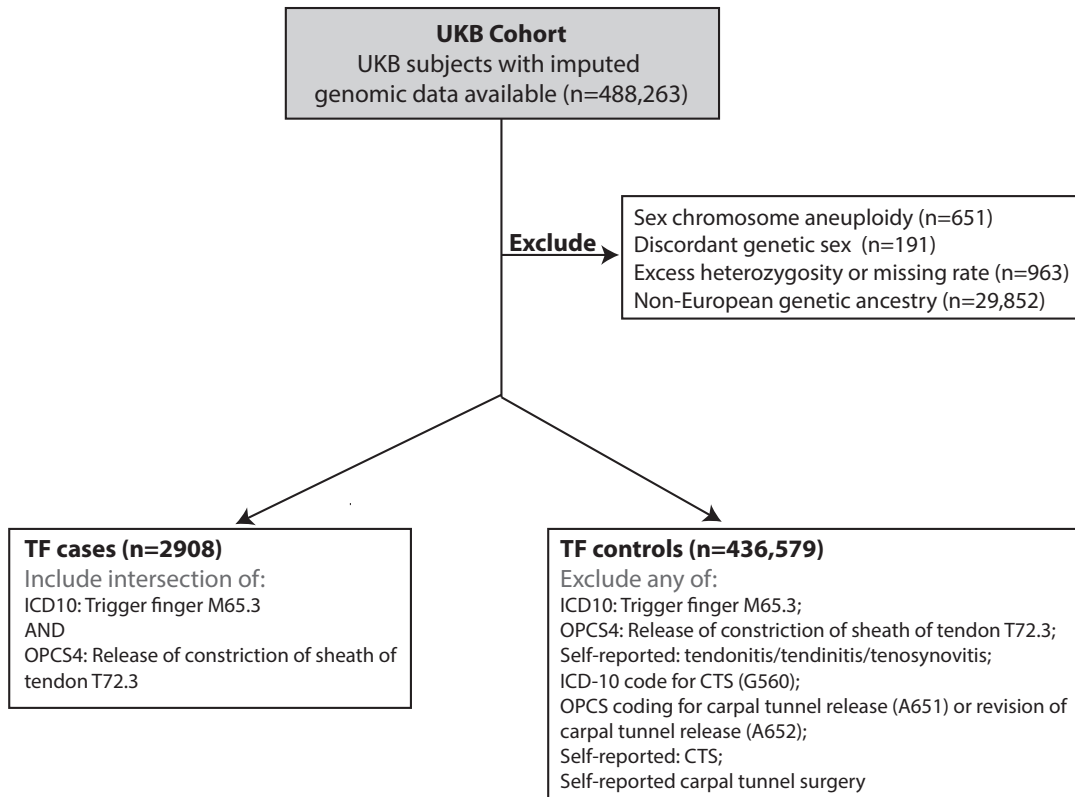

**Figure S1:** CONSORT diagram summarizing the selection of case (n=2908) and control (n=436,579) cohorts for trigger finger (TF) genome-wide association analysis in European subjects from UKB cohort.
